# Supplementary material
Source: PubMed Central journal article supplement (PMC6800775)
Supplement: NIHMS1043212-supplement-Supp_info.pdf [file NIHMS1043212-supplement-Supp_info.pdf]

# Supplementary information

## Determinants of target prioritization and regulatory hierarchy for the bacterial small RNA SgrS

**Maksym Bobrovskyy<sup>1,2</sup>, Muhammad S. Azam<sup>1</sup>, Jane K. Frandsen<sup>3,4,5</sup>, Jichuan Zhang<sup>6</sup>, Anustup Poddar<sup>6</sup>, Xiangqian Ma<sup>1</sup>, Tina M. Henkin<sup>3</sup>, Taekjip Ha<sup>6,7</sup> and Carin K. Vanderpool<sup>1\*</sup>**

<sup>1</sup>Department of Microbiology, University of Illinois at Urbana-Champaign, 601 S. Goodwin Ave., Urbana, Illinois 61801

<sup>2</sup>Present address: Department of Microbiology, The University of Chicago, 920 E. 58<sup>th</sup> St., Chicago, Illinois 60637

<sup>3</sup>Department of Microbiology and Center for RNA Biology, The Ohio State University, Columbus, Ohio 43210

<sup>4</sup>Biochemistry Program, The Ohio State University, Columbus, OH 43210

<sup>5</sup>Present address: Department of Biochemistry and Molecular Biology, Pennsylvania State University, State College, Pennsylvania, USA 16802

<sup>6</sup>Department of Biophysics and Biophysical Chemistry, Johns Hopkins University, Baltimore, Maryland, USA 21205

<sup>7</sup>Howard Hughes Medical Institute, Baltimore, Maryland, USA 21205

\*Corresponding author  
Carin K. Vanderpool, Ph.D.  
(t) 217-333-7033  
(f) 217-244-6697  
[cvanderp@illinois.edu](mailto:cvanderp@illinois.edu)

**Table S1. Strains and plasmids used in this study.**

| Plasmid | Vector            | Genotype                                                                                                                                               | Source or Reference                   |
|---------|-------------------|--------------------------------------------------------------------------------------------------------------------------------------------------------|---------------------------------------|
| pLCV1   | pHDB3             | P <sub>lac</sub> - <i>sgrS</i>                                                                                                                         | Vanderpool <i>et al.</i> , 2004       |
| pHDB3   | pBR322 derivative | vector control                                                                                                                                         | Wadler <i>et al.</i> , 2009           |
| pZAMB1  | pZA31R            | P <sub>Ltet0-1</sub> - <i>sgrS</i>                                                                                                                     | Bobrovskyy <i>et al.</i> , 2016       |
| pZEMB8  | pZE12S            | P <sub>Llac0-1</sub> - <i>ptsG-gfp</i>                                                                                                                 | Bobrovskyy <i>et al.</i> , 2016       |
| pZEMB10 | pZEMB8            | P <sub>Llac0-1</sub> - <i>manX-gfp</i>                                                                                                                 | This study                            |
| pZEMB15 | pZEMB8            | P <sub>Llac0-1</sub> - <i>yigL-gfp</i>                                                                                                                 | This study                            |
| pZEMB25 | pZEMB8            | P <sub>Llac0-1</sub> - <i>purR-gfp</i>                                                                                                                 | Bobrovskyy <i>et al.</i> , 2016       |
| pZEMB26 | pZEMB8            | P <sub>Llac0-1</sub> - <i>asdl-gfp</i>                                                                                                                 | This study                            |
| pZEMB27 | pZEMB8            | P <sub>Llac0-1</sub> - <i>asdl-II-gfp</i>                                                                                                              | This study                            |
|         |                   |                                                                                                                                                        |                                       |
| Strain  | Background        | Genotype                                                                                                                                               | Source or Reference                   |
| BW14894 | BL21 (DE3)        | $\Delta$ <i>lac</i> X74, $\Delta$ <i>phn33-30</i>                                                                                                      | G. M. Yakovleva, <i>et al.</i> , 1998 |
| CV104   | DJ480             | $\Delta$ <i>lac</i> X74, <i>mal::lac<sup>f</sup></i> , $\Delta$ <i>sgrS::kan</i>                                                                       | C. K. Vanderpool, S. Gottesman, 2004  |
| DJ480   | MG1655            | $\Delta$ <i>lac</i> X74                                                                                                                                | D. Jin, NCI                           |
| DJS2411 |                   | <i>hfq</i> Q8A                                                                                                                                         | S. Gottesman, NCI                     |
| DJS2420 |                   | <i>hfq</i> Y25D                                                                                                                                        | S. Gottesman, NCI                     |
| JH111   | CS104             | <i>lattB::lac<sup>f</sup></i> - PN25 <i>tet<sup>R</sup>-spec<sup>R</sup></i>                                                                           | Wadler <i>et al.</i> , 2007           |
| MB170   | PM1203            | pBAD- <i>asdl-lacZ</i> , <i>lattB::lacIq</i> -PN25 <i>tet<sup>R</sup>-spec<sup>R</sup></i>                                                             | This study                            |
| MB171   | PM1203            | pBAD- <i>asdl-II-lacZ</i> , <i>lattB::lacIq</i> -PN25 <i>tet<sup>R</sup>-spec<sup>R</sup></i>                                                          | This study                            |
| MB183   | PM1203            | pBAD- <i>asdl-lacZ</i> , <i>lattB::lacIq</i> -PN25 <i>tet<sup>R</sup>-spec<sup>R</sup></i>                                                             | This study                            |
| NM200   | MG1655            | $\Delta$ <i>lac</i> X74, <i>mini</i> $\lambda$ :: <i>cat</i>                                                                                           | N. Majdalani, NCI                     |
| PM1205  | PM1203            | <i>lacI::P<sub>BAD</sub>-cat-sacB-lacZ</i> , <i>mini</i> $\lambda$ <i>tet<sup>R</sup></i> , $\Delta$ <i>araBAD araC+</i> , <i>mal::lac<sup>f</sup></i> | Mandin <i>et al.</i> , 2009           |
| SA1408  | NM2000            | <i>hfq::cat-sacB</i> , <i>mal::lacIq</i>                                                                                                               | This study                            |
| SA1410  | NM2000            | <i>hfq</i> R16A                                                                                                                                        | This study                            |
| TK310   | MG1655            | $\Delta$ <i>cyaA</i> $\Delta$ <i>cpdA</i> $\Delta$ <i>lacY</i>                                                                                         | T. Kuhlman, <i>et al.</i> , 2007      |
| XM102   | JH111             | $\Delta$ <i>sgrS</i> , <i>hfq::cat-sacB</i> , <i>mal::lac<sup>f</sup></i>                                                                              | This study                            |
| XM105   | XM102             | pSIM6                                                                                                                                                  | This study                            |
| XM106   | JH111             | <i>hfq</i> Q8A                                                                                                                                         | This study                            |
| XM107   | JH111             | <i>hfq</i> Y25D                                                                                                                                        | This study                            |
| XM108   | JH111             | <i>hfq</i> Q8A                                                                                                                                         | This study                            |

**Table S2. Oligonucleotides used in this study.**

| <b>Oligo</b> | <b>Description</b>                                                                                         | <b>Sequence 5'-3'</b>                                                  |
|--------------|------------------------------------------------------------------------------------------------------------|------------------------------------------------------------------------|
| MBP84F       | T7 forward primer for <i>in vitro</i> transcription <i>ptsG</i> (+1)                                       | TAATACGACTCACTATAGGATAAATAAAGGGCGCTTAGATGCCCTG                         |
| MBP213R      | reverse primer for <i>in vitro</i> transcription <i>ptsG</i> (+240)                                        | TGCGATACAACGGCGGGC                                                     |
| O-JH218      | T7 forward primer for <i>in vitro</i> transcription <i>manX</i> (+1)                                       | TAATACGACTCACTATAGGGGATGAAGCAAGGGGGTGCCCATG                            |
| MBP214R      | reverse primer for <i>in vitro</i> transcription <i>manX</i> (+240)                                        | GCATTTTACCTGGAACGAAATCGATCC                                            |
| MBP56F       | T7 forward primer for <i>in vitro</i> transcription <i>asd</i> (+1)                                        | TAATACGACTCACTATAGGATGTGCCAAGAGGAGACCGG                                |
| MBP215R      | reverse primer for <i>in vitro</i> transcription <i>asdI-II</i> (+240)                                     | AGATCAAAGGCATCCTGAAGTGTGC                                              |
| MBP222R      | reverse primer for <i>in vitro</i> transcription <i>asdI</i> (+110)                                        | GAACGGAGCCGACCATACCG                                                   |
| MBP226F      | T7 forward primer for <i>in vitro</i> transcription <i>asdII</i> (+51)                                     | TAATACGACTCACTATAGGGTTGGTTTTATCGGCTGGCGCG                              |
| MBP226R      | reverse primer for <i>in vitro</i> transcription <i>asdII</i> (+310)                                       | TGGATAGATTTCTGTTGGTATAATCGCCGCC                                        |
| MBP225F      | T7 forward primer for <i>in vitro</i> transcription <i>yigL</i> (-250 relative to <i>yigL</i> start codon) | TAATACGACTCACTATAGGCCAACGCTTCTCTTGACGGC                                |
| MBP216R      | reverse primer for <i>in vitro</i> transcription <i>yigL</i> (+50 relative to <i>yigL</i> start codon)     | TCGGGAGAAAGTAACGTGCCATC                                                |
| MBP65F       | T7 forward primer for <i>in vitro</i> transcription <i>purR</i> (+1)                                       | TAATACGACTCACTATAGGTACTACTATTTGCGTACTGGCCATTGACC                       |
| MBP174R      | reverse primer for <i>in vitro</i> transcription <i>purR</i> (+290)                                        | TGTTTTGTTGATCACGTGTGACACAGTTGT                                         |
| MBP16F2      | forward primer for <i>yigL</i> cloning to make pZEMB15                                                     | CCCCGAATTCGAACGCGTGGTGGATAAACC GCATG                                   |
| MBP16R41     | reverse primer for <i>yigL</i> cloning to make pZEMB15                                                     | CCCCGGTACCCGCAAACACAAAGTTGATGCCGCG                                     |
| MBP2F        | forward primer for <i>manX</i> cloning to make pZEMB10                                                     | CCCCGAATTCGCGAAACGCAGGGGTTTTTGGTTG                                     |
| MBP2R34      | reverse primer for <i>manX</i> cloning to make pZEMB10                                                     | CCCCGGTACCGATCCAGCCGACGTTTTCTGCTC                                      |
| MBP92F       | forward primer for <i>asd</i> cloning to make pZEMB26 or pZEMB27                                           | CCCCGAATTCATGTGCCAAGAGGAGACCGG                                         |
| MBP92R1      | reverse primer for <i>asdI</i> cloning to make pZEMB26                                                     | CCCCGGTACCCTGAGAAGTAGAAAAGAAGACAGGGCG                                  |
| MBP92R2      | reverse primer for <i>asdI-II</i> cloning to make pZEMB27                                                  | CCCCGGTACCATACCGCGCCAGCCGATAAAAC                                       |
| MBP151F      | forward primer for cloning <i>asd</i> into PM1205                                                          | ACCTGACGCTTTTTATCGCAACTCTCTACTGTTTCTCATATGTGCCAAGAGGAGACCGG            |
| MBP151R      | reverse primer for cloning <i>asdI</i> into PM1205                                                         | TAACGCCAGGTTTTCCAGTCACGACGTTGTA AACGACCATAAGCGTTTTTTCTGCAAAGATGTGTGCTG |
| MBP193F      | Forward primer for cloning <i>asdII</i> into PM1205                                                        | ACCTGACGCTTTTTATCGCAACTCTCTACTGTTTCTCATCTTTGCAGGAAAAAACGCT             |

|         |                                                                        |                                                                                                                                                                                                                                                                                                                                                                                                                                                                                                                                                                                               |
|---------|------------------------------------------------------------------------|-----------------------------------------------------------------------------------------------------------------------------------------------------------------------------------------------------------------------------------------------------------------------------------------------------------------------------------------------------------------------------------------------------------------------------------------------------------------------------------------------------------------------------------------------------------------------------------------------|
| MBP193R | Reverse primer for cloning <i>asdI-II</i> and <i>asdII</i> into PM1205 | TAACGCCAGGTTTTCCCAGTCACGACGTTGTAAAAC<br>GACGGCGTCTGAAGTCGCGCTC                                                                                                                                                                                                                                                                                                                                                                                                                                                                                                                                |
| SgrS    | SgrS probes for smFISH                                                 | GTGCTGATAAAACTGACGCA<br>ACTTCGCTGTGCGGGTAAAA<br>CTTAACCAACGCAACCAGCA<br>CATGGTTAATCGTTGTGGGA<br>ATCCCACTGCATCAGTCCTT<br>GTCAACTTTCAGAATTGCGG<br>TCAGTCACACATGATGCAGG<br>GCGGGTGATTTTACACCAAT<br>AACCAGCAGGTATAATCTGC                                                                                                                                                                                                                                                                                                                                                                          |
| lacZ    | <i>lacZ</i> probes for smFISH                                          | GTGAATCCGTAATCATGGTC<br>TATTACGCCAGCTGGCGAAA<br>AGTATCGGCCTCAGGAAGAT<br>AATGTGAGCGAGTAACAACC<br>AGATGAAACGCCGAGTTAAC<br>ATCTTCCAGATAACTGCCGT<br>TTAAAGCGAGTGGCAACATG<br>TTTCGACGTTCCAGACGTAGT<br>ACCATTTTCAATCCGCACCT<br>TCTGCTCATCCATGACCTGA<br>TGGTTCGGATAATGCGAACA<br>ATCGGTCAGACGATTCATTG<br>GATCGACAGATTTGATCCAG<br>TATTCGCAAAGGATCAGCGG<br>AAACGGGGATACTGACGAAA<br>TCGGCGTATCGCCAAAATCA<br>ACGGAAGTGGAAAAACTGCT<br>TTTACCTTGTGGAGCGACAT<br>AGCGTCACACTGAGGTTTTTC<br>CGGTAAATTGCCAACGCTT<br>TACGCCAATGTCGTTATCCA<br>GTAATCGCCATTTGACCACT<br>ATAATTCAATTCGCGCGTCC<br>ATTCAGCCATGTGCCTTCTT |
| 1       | <i>sgrS</i> qPCR forward primer                                        | GCTTGAAGGACTGATGCAGTGGGATGACCCG                                                                                                                                                                                                                                                                                                                                                                                                                                                                                                                                                               |
| 2       | <i>sgrS</i> qPCR reverse primer                                        | CACCAATACTCAGTCACACATGATGCAGGC                                                                                                                                                                                                                                                                                                                                                                                                                                                                                                                                                                |
| 3       | <i>ptsG-1</i> qPCR forward primer                                      | GTATCCGTAATCGCTATCGCAGGTATTCTG                                                                                                                                                                                                                                                                                                                                                                                                                                                                                                                                                                |
| 4       | <i>ptsG-1</i> qPCR reverse primer                                      | CGGATACGCCATCGTTATTGGTAAAGCC                                                                                                                                                                                                                                                                                                                                                                                                                                                                                                                                                                  |
| 5       | <i>ptsG-2</i> qPCR forward primer                                      | GTACTGCCTATCGCAGGTATTCTGCTG                                                                                                                                                                                                                                                                                                                                                                                                                                                                                                                                                                   |
| 6       | <i>ptsG-2</i> qPCR reverse primer                                      | CAGTGGCATGTTTGCAAAGACGGAAC                                                                                                                                                                                                                                                                                                                                                                                                                                                                                                                                                                    |
| 7       | <i>ptsG-3</i> qPCR forward primer                                      | TGGTTGCTGCATTTGGTGGT                                                                                                                                                                                                                                                                                                                                                                                                                                                                                                                                                                          |
| 8       | <i>ptsG-3</i> qPCR reverse primer                                      | GCCGGCCTGATCCACTTTAG                                                                                                                                                                                                                                                                                                                                                                                                                                                                                                                                                                          |
| 9       | <i>yigL</i> qPCR forward primer                                        | CTAACGTTTATCGCGACGACG                                                                                                                                                                                                                                                                                                                                                                                                                                                                                                                                                                         |
| 10      | <i>yigL</i> qPCR reverse primer                                        | CAGGCTCATACAGCGCATATT                                                                                                                                                                                                                                                                                                                                                                                                                                                                                                                                                                         |
| 11      | <i>manXYZ</i> qPCR forward primer                                      | CTCGACACCACTAAAGGCGTGCTG                                                                                                                                                                                                                                                                                                                                                                                                                                                                                                                                                                      |
| 12      | <i>manXYZ</i> qPCR reverse primer                                      | CGTTTCCACGAGCATTGGAATGTTAACG                                                                                                                                                                                                                                                                                                                                                                                                                                                                                                                                                                  |

|       |                                                         |                      |
|-------|---------------------------------------------------------|----------------------|
| 13    | <i>rrsAq</i> PCR forward primer                         | AGGCCTTCGGGTTGTAAAGT |
| 14    | <i>rrsAq</i> PCR reverse primer                         | ATTCCGATTAACGCTTGCAC |
| SA035 | forward primer for amplification of <i>hfq</i> variants | AAGCGGCAGATAACCTGGCT |
| SA036 | reverse primer for amplification of <i>hfq</i> variants | GTGTACCAGTACCGCCTGCT |

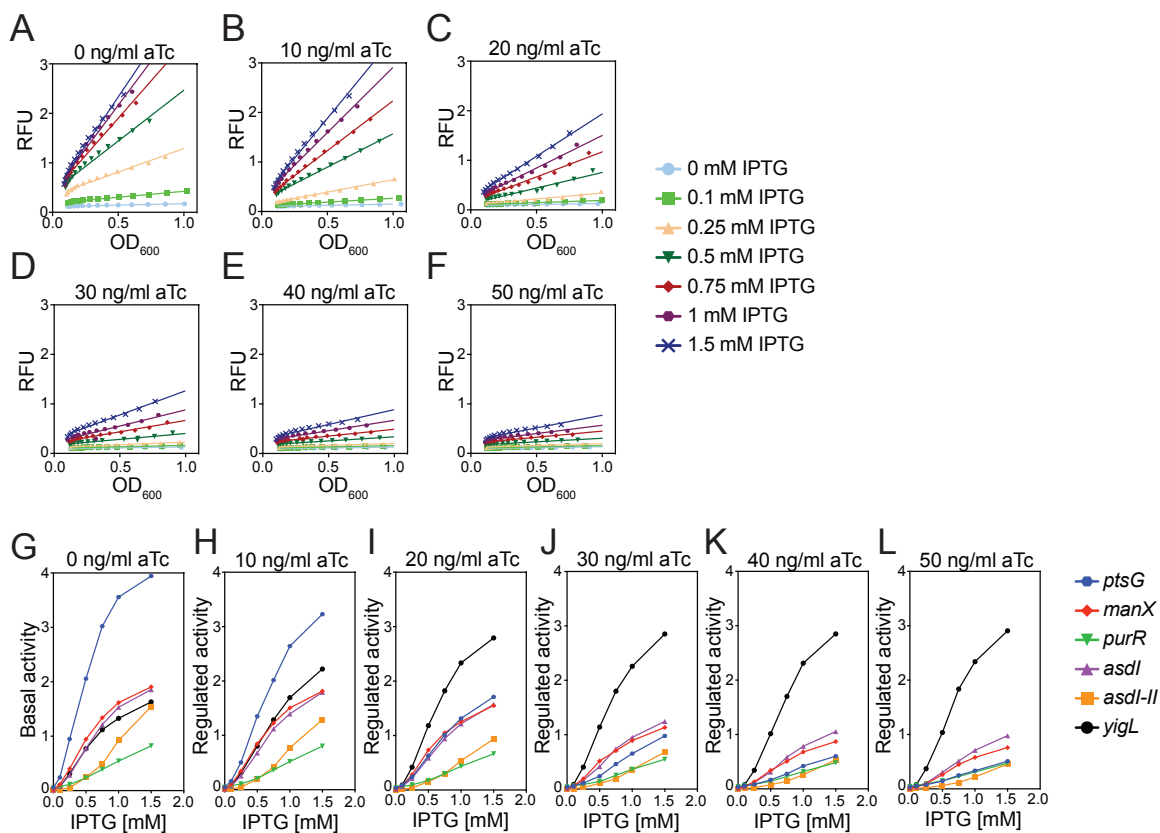

**Figure S1. Inducer concentration-dependent activity and regulation of the target-*sfgfp* fusions.**

A) Plots of *ptsG-sfgfp* translational fusion activity (RFU) over optical density of the culture (OD<sub>600</sub>) at various IPTG inducer concentrations at A) basal (0 ng/ml aTc) or B-F) increasing SgrS expression levels (10-50 ng/ml aTc). Slopes of the linear regression plots for each IPTG concentration were calculated to obtain “basal activity” (0 ng/ml aTc) and “regulated activity” (10-50 ng/ml aTc) values. G) Basal activity (0 ng/ml aTc) or H-L) regulated activity (10-50 ng/ml aTc) of *ptsG*, *manX*, *purR*, *asdl*, *asdl-II* and *yigL* fused to *sfgfp* reporter at varying IPTG concentrations (0-1.5 mM IPTG).

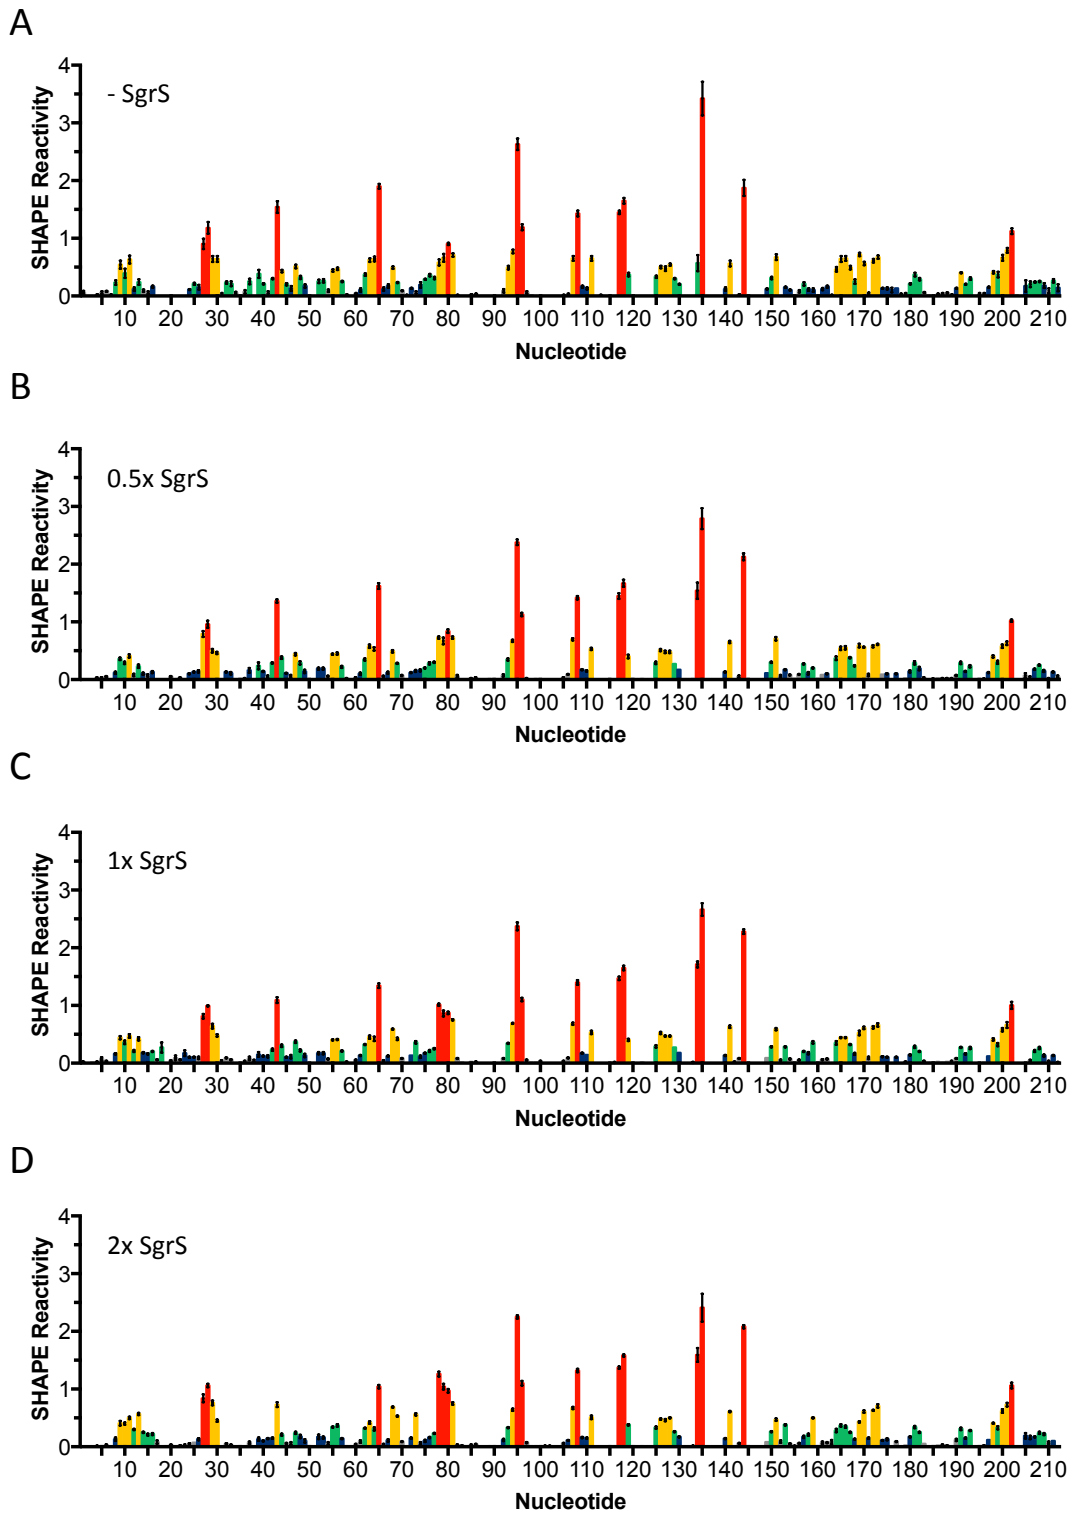

**E**

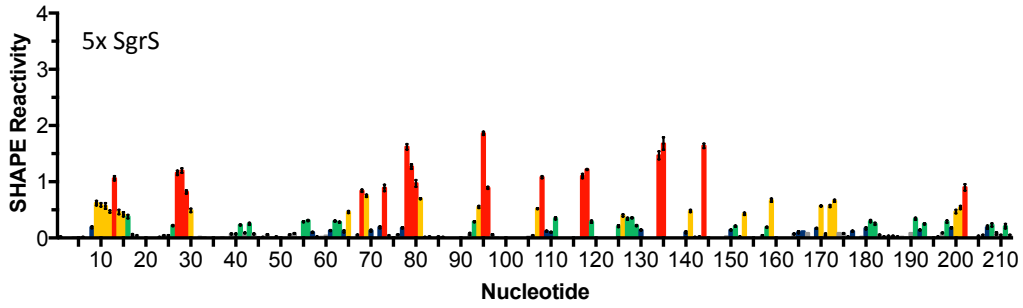

**F**

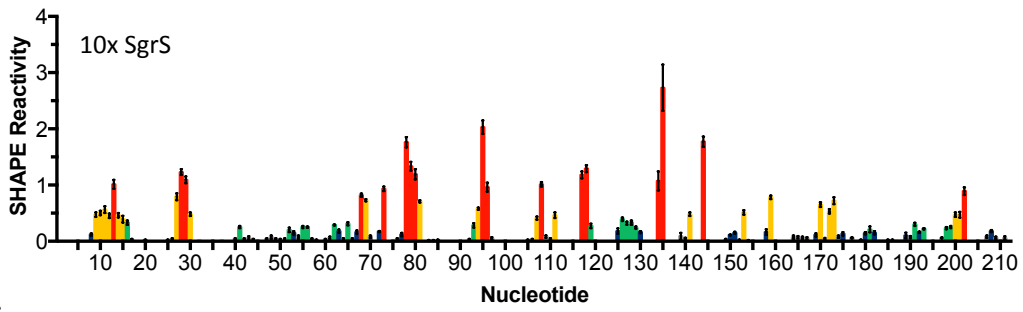

**G**

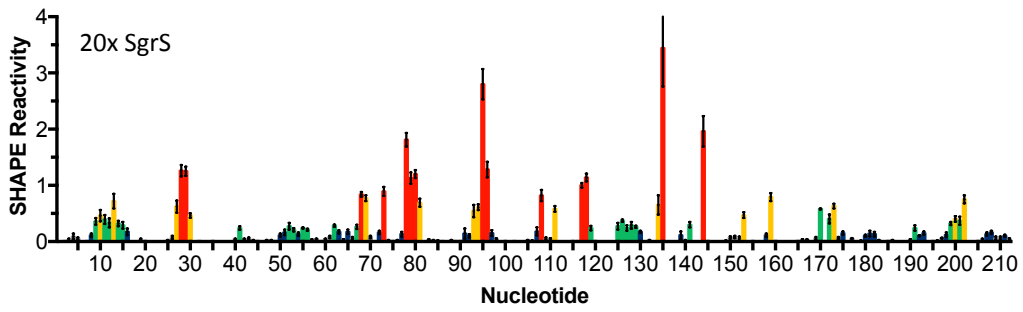

**H**

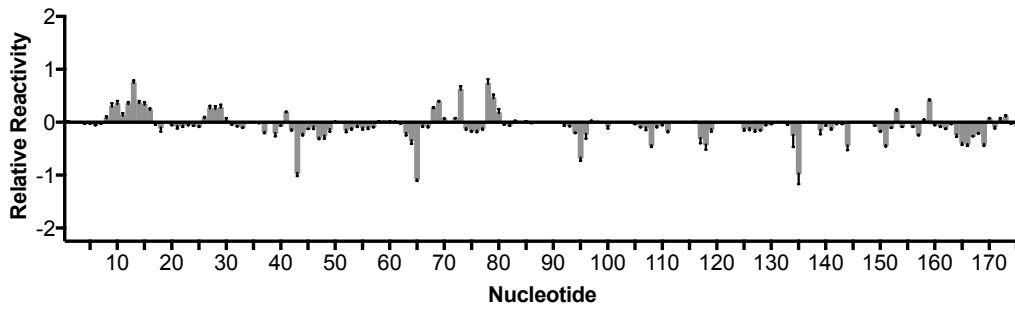



I

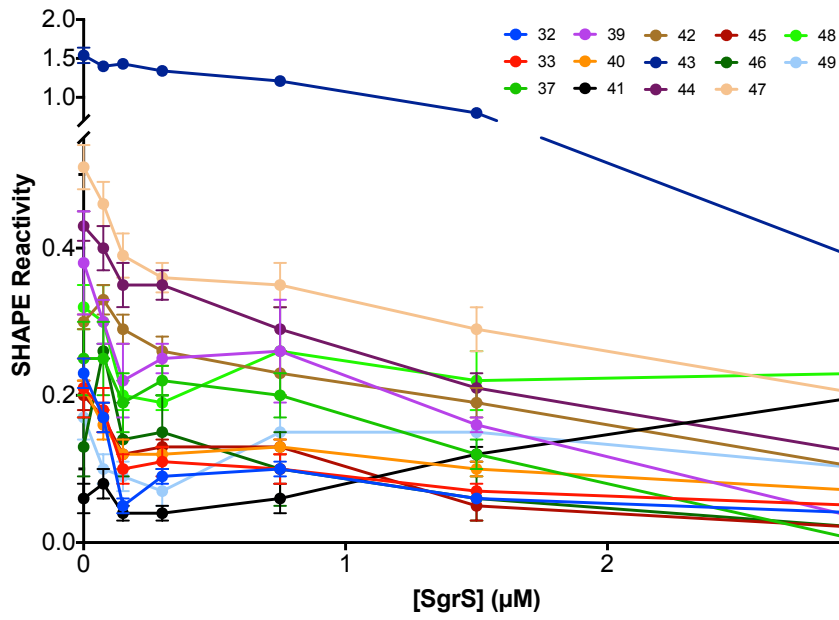

J

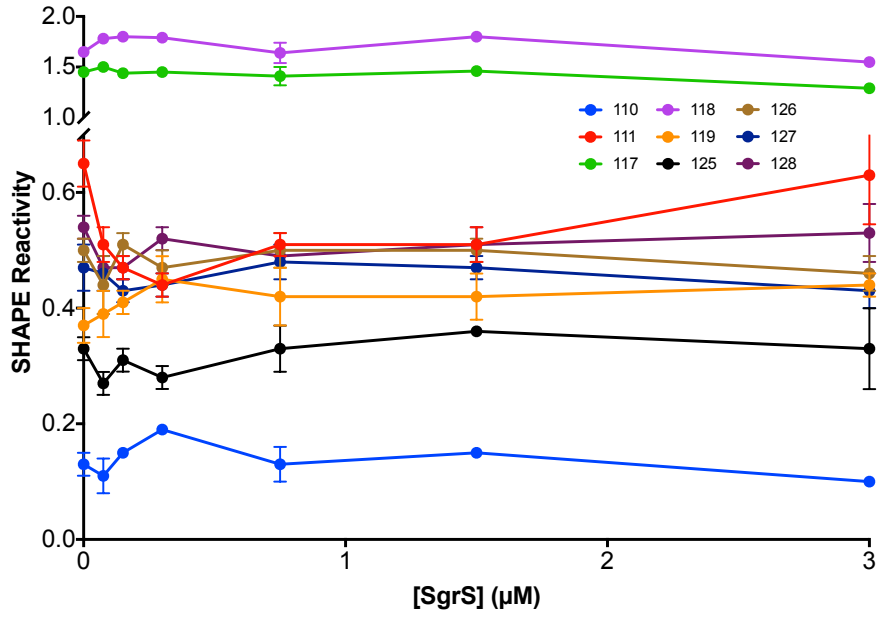

**Figure S2. SHAPE analysis of *asdI-II* RNA.** A-G) SHAPE reactivity of the *asdI-II* RNA alone and in complex with increasing concentrations of SgrS (0.5, 1, 2, 5, 10, or 20X). The structure of the *asdI-II* RNA in the absence and presence of SgrS was probed with NMIA and the modified RNA was analyzed by primer extension inhibition. SHAPE reactivity is the difference between the frequency of primer extension products at each nucleotide in +NMIA vs. -NMIA samples. Colors indicate SHAPE reactivity as following: red, highly reactive ( $\geq 0.8$ ); gold, reactive (0.4-0.79); green, moderately reactive (0.2-0.39); blue, minimally reactive (0.1-0.19); grey, unreactive ( $< 0.01$ ). H) Relative SHAPE reactivity of the *asdI-II* RNA in the presence of wild-type vs mutant SgrS. Relative reactivity is the difference in the SHAPE reactivity in the presence of wild-type and mutant SgrS. Error bars denote SEM,  $n = 9$ . The *asdI-II* RNA nucleotides are numbered below the X-axis and the SgrS binding sites are indicated. I-J) SHAPE reactivity as a function of mutant SgrS concentration for binding site I (I) and site II (J). The same nucleotides as in Fig. 5D are shown. Error bars denote SEM,  $n = 6$ .

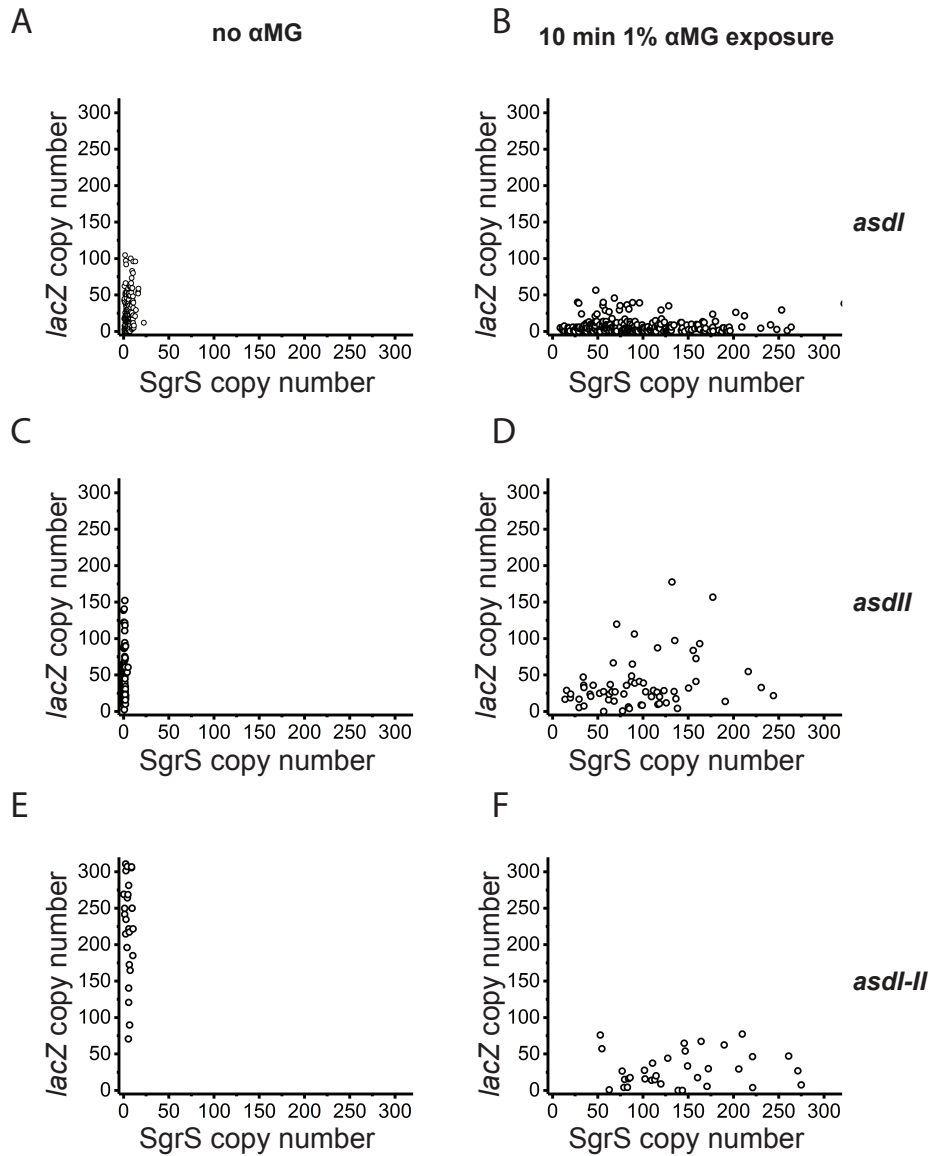

**Figure S3. Quantification of SgrS and *asd* mRNA variants using STORM.** Copy number of *lacZ* mRNA vs. SgrS sRNA in 30-250 individual cells for the different *asd-lacZ* variants, (A-B) *asdI-lacZ*, (C-D) *asdII-lacZ*, and (E-F) *asdI-II-lacZ*, before (A,C,E) and after (B,D,F) 10 min 1%  $\alpha$ MG induction.

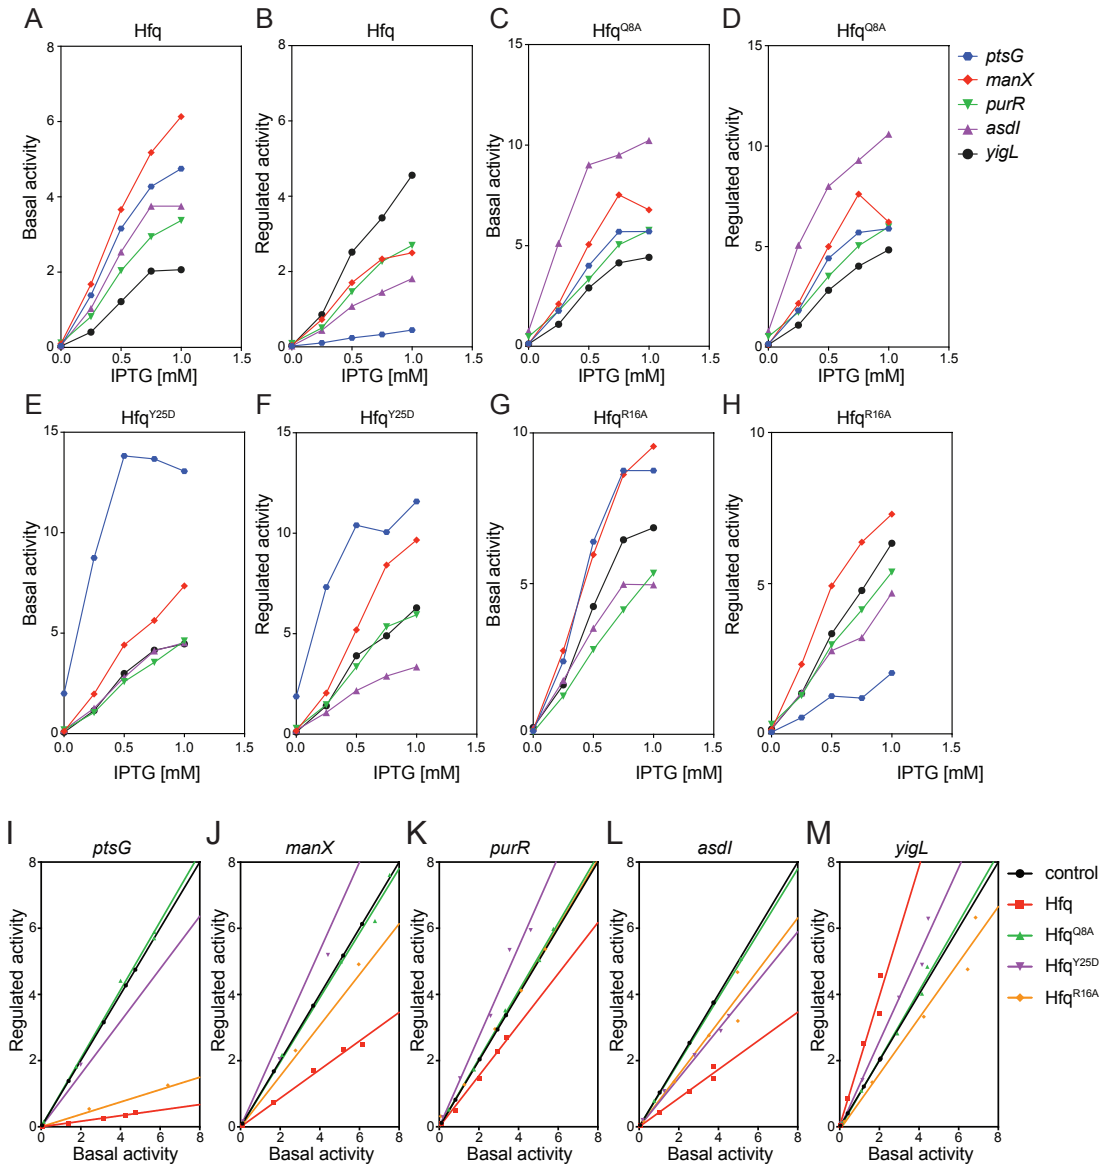

**Figure S4. Inducer concentration-dependent activity of target-*sfgfp* fusions in the Hfq mutant strains.** Basal activity (0 ng/ml aTc) or regulated activity (50 ng/ml aTc) of *ptsG*, *manX*, *purR*, *asdI*, and *yigL* fusions plotted as a function of IPTG concentrations (0, 0.1, 0.25, 0.5 and 1 mM IPTG) for A, B) wild-type, C, D) Hfq<sup>Q8A</sup>, E, F) Hfq<sup>Y25D</sup> and G, H) Hfq<sup>R16A</sup> strains. Regulated activity plotted as a function of basal activity for I) *ptsG*, J) *manX*, K) *purR*, L) *asdI*, and M) *yigL* fused to *sfgfp* reporter gene in wild-type, Hfq<sup>Q8A</sup>, Hfq<sup>Y25D</sup> and Hfq<sup>R16A</sup> strains. The plots with slopes =1 indicate lack of SgrS regulation, <1 indicate repression and >1 indicate activation by SgrS.

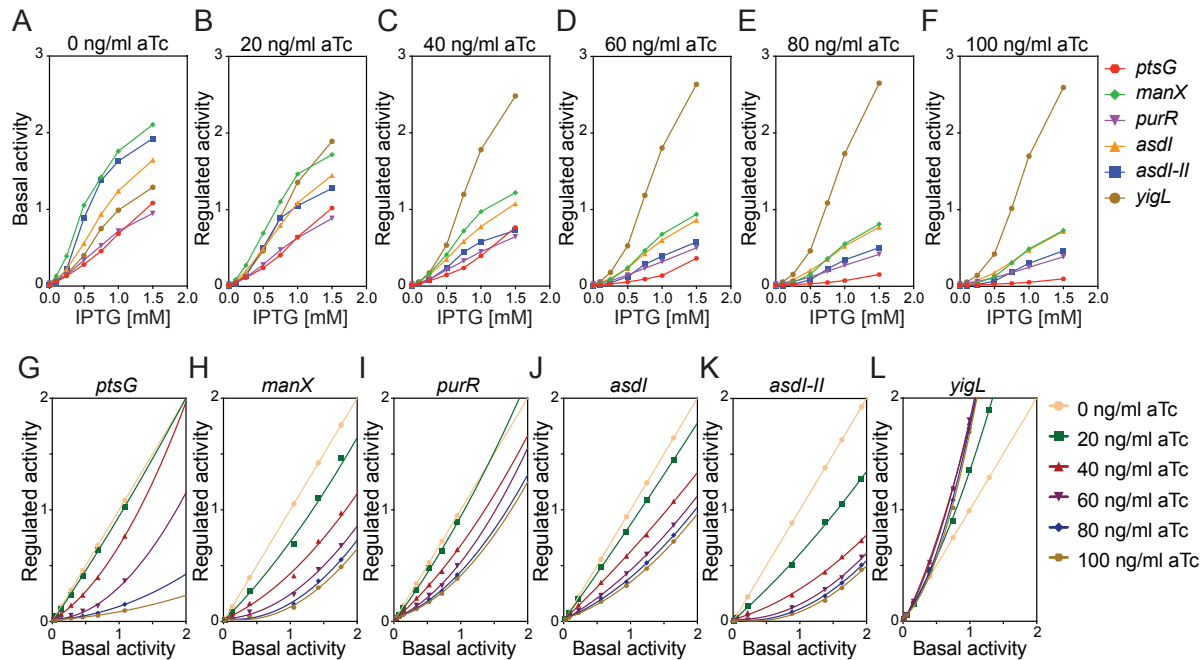

**Figure S5. Inducer concentration-dependent activity of target-sfgfp fusions in the *rne701* mutant strain.** A) Basal activity (0 ng/ml aTc) or B-F) regulated activity (20-100 ng/ml aTc) of *ptsG*, *manX*, *purR*, *asdI*, *asdI-II* and *yigL* fusions plotted as a function of IPTG concentrations (0, 0.1, 0.25, 0.5, 1 and 1.5 mM IPTG). Regulated activity plotted as a function of basal activity for G) *ptsG*, H) *manX*, I) *purR*, J) *asdI*, K) *asdI-II* and L) *yigL* fused to *sfgfp* reporter gene in the *rne701* mutant strain. The plots with slopes =1 indicate lack of SgrS regulation, <1 indicate repression and >1 indicate activation by SgrS.
